# Supplementary material for: Ratiometric/‘turn-on’ fluorescent chemosensor for CN−: mimicking XNOR logic function with Fe3+ ions
Source: Royal Society of Chemistry journal article supplement (doi:10.1039/c3dt50142f), 2013-01-01
Supplement: c3dt50142f.pdf [file c3dt50142f.pdf]

## Supplementary Information

# Ratiometric/'turn-On' fluorescent chemosensor for CN<sup>-</sup>: mimicking XNOR logic function with Fe<sup>3+</sup> ions

Manoj Kumar,\* Rajesh Kumar, Vandana Bhalla

Department of Chemistry, UGC Sponsored-Center for Advance Studies-1,  
Guru Nanak Dev University  
Amritsar (Pb)-143005, India  
Email:[mksharmaa@yahoo.co.in](mailto:mksharmaa@yahoo.co.in)

| Contents                                                                                                                                 | Page No. |
|------------------------------------------------------------------------------------------------------------------------------------------|----------|
| 1. <sup>1</sup> H NMR spectrum of <b>5</b> in CDCl <sub>3</sub> .<br>S2                                                                  |          |
| 2. FAB mass spectrum of <b>5</b> .                                                                                                       | S3       |
| 3. <sup>1</sup> H NMR spectrum of <b>6</b> in CDCl <sub>3</sub> .                                                                        | S4       |
| 4. <sup>13</sup> C NMR spectrum of <b>6</b> in CDCl <sub>3</sub> .                                                                       | S5       |
| 5. ESI-MS mass spectrum of <b>6</b> .                                                                                                    | S6       |
| 6. <sup>1</sup> H NMR spectrum of <b>7</b> in CDCl <sub>3</sub> .                                                                        | S7       |
| 7. <sup>13</sup> C NMR spectrum of <b>7</b> in CDCl <sub>3</sub> .                                                                       | S8       |
| 8. FAB-MS mass spectrum of <b>7</b> .                                                                                                    | S9       |
| 9. Fluorescence spectra of compound <b>7</b> with CN <sup>-</sup> in THF.                                                                | S10      |
| 10. Selectivity of compound <b>7</b> towards CN <sup>-</sup> in the presence of different anions in THF.                                 | S11      |
| 11. <sup>1</sup> H NMR of compound <b>5</b> + CN <sup>-</sup> ions in CDCl <sub>3</sub> .                                                | S12      |
| 12. <sup>1</sup> H NMR of compound <b>6</b> + CN <sup>-</sup> ions in CDCl <sub>3</sub> .                                                | S13      |
| 13. Selectivity of compound <b>5</b> towards CN <sup>-</sup> in the presence of different anions in THF.                                 | S14      |
| 14. Job plot of compounds <b>5-7</b> with CN <sup>-</sup> in THF.                                                                        | S15      |
| 15. Fluorescence spectra of compound <b>5</b> with Fe <sup>3+</sup> in THF.                                                              | S16      |
| 16. Fluorescence emission spectra of receptor <b>7</b> upon various addition of Fe <sup>3+</sup> in THF.                                 | S17      |
| 17. Pictorial representation of binding modes of compound <b>5-7</b> with Fe <sup>3+</sup> ion.                                          | S18      |
| 18. Selectivity of compounds <b>5</b> and <b>6</b> towards Fe <sup>3+</sup> in THF.                                                      | S19      |
| 19. Selectivity and competitive selectivity of <b>7</b> towards Fe <sup>3+</sup> in THF.                                                 | S20      |
| 20. Job plot of compounds <b>5-7</b> with Fe <sup>3+</sup> in THF.                                                                       | S21      |
| 21. Fluorescence spectra of <b>6</b> .Fe <sup>3+</sup> and <b>7</b> .Fe <sup>3+</sup> complexes upon addition of CN <sup>-</sup> in THF. | S22      |
| 22. Reversibility of <b>5</b> .Fe <sup>3+</sup> complex with addition of CN <sup>-</sup> ion.                                            | S23      |
| 23. Selectivity of <b>5</b> .Fe <sup>3+</sup> complex towards CN <sup>-</sup> in the presence of other anions in THF.                    | S24      |

1.  $^1\text{H}$  NMR spectrum of **5** in  $\text{CDCl}_3$ .

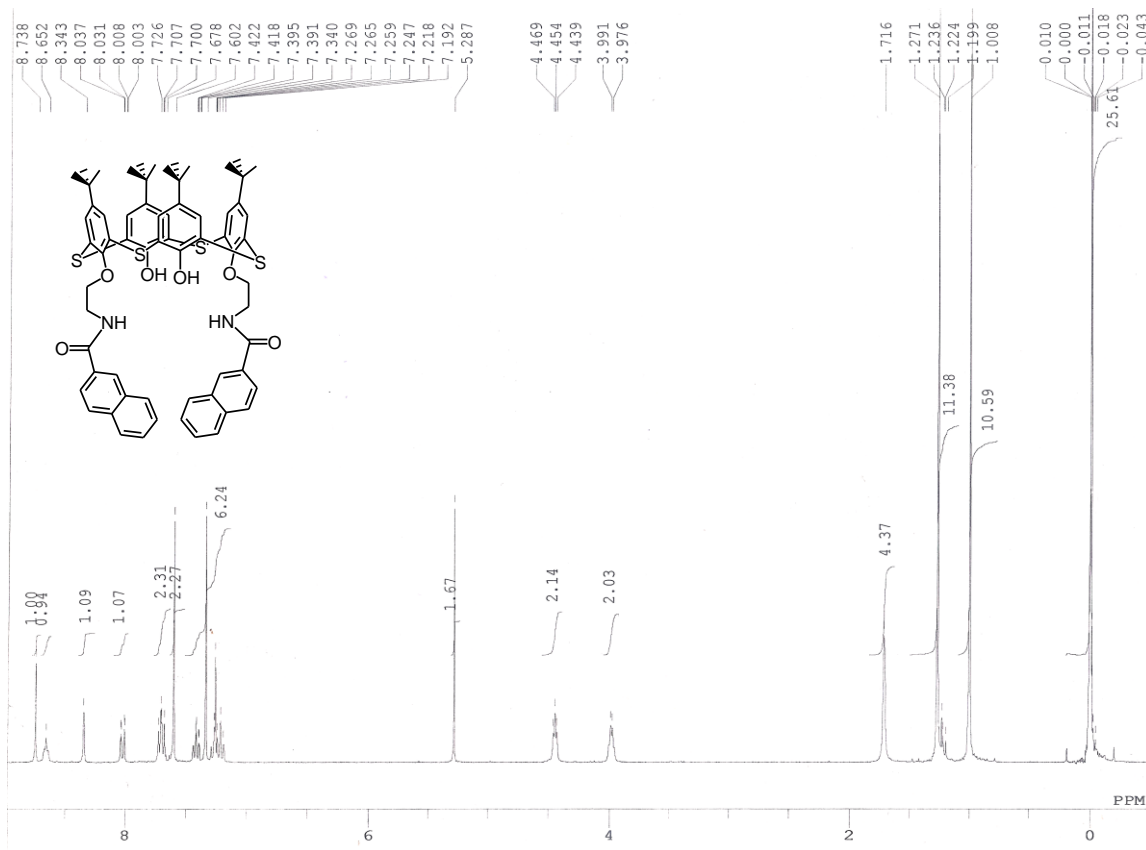

Figure S1.  $^1\text{H}$  NMR spectrum of **5** in  $\text{CDCl}_3$ .

## 2. FAB mass spectrum of 5.

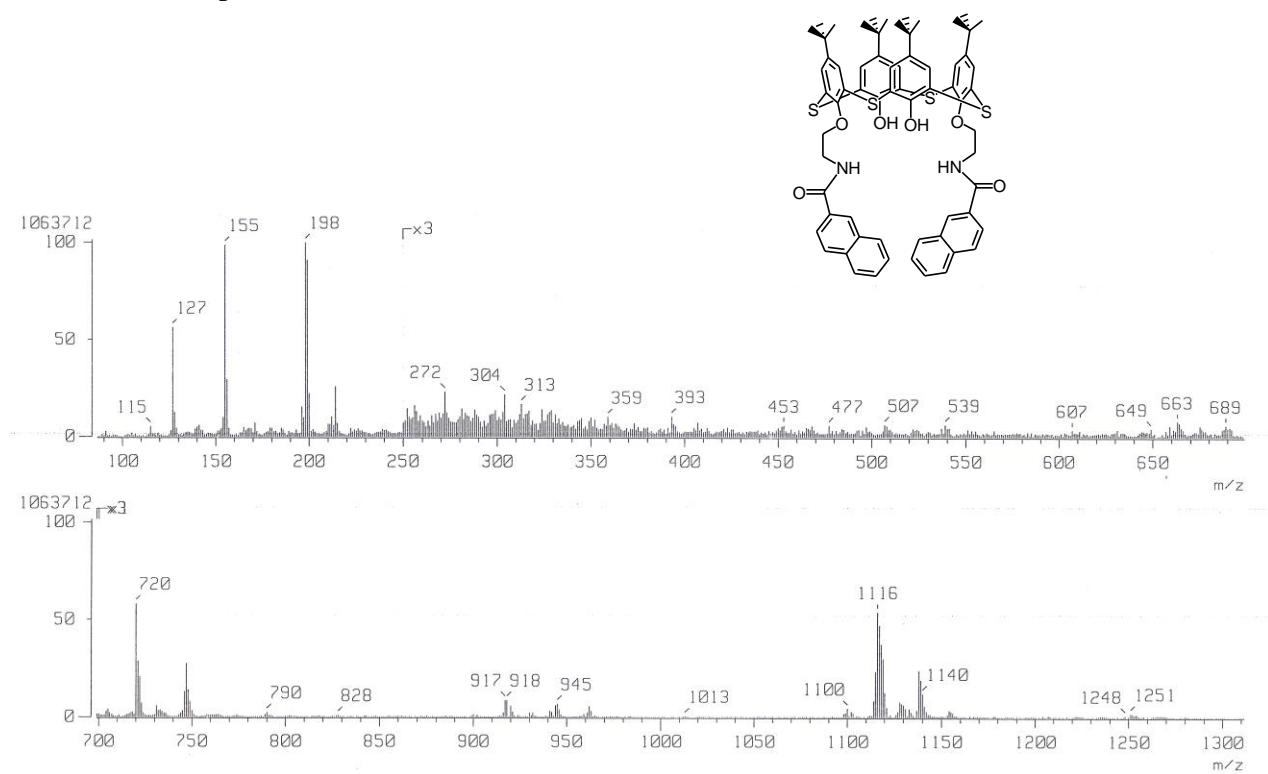

**Figure S2.** FAB mass spectrum of 5.

3.  $^1\text{H}$  NMR spectrum of **6** in  $\text{CDCl}_3$ .

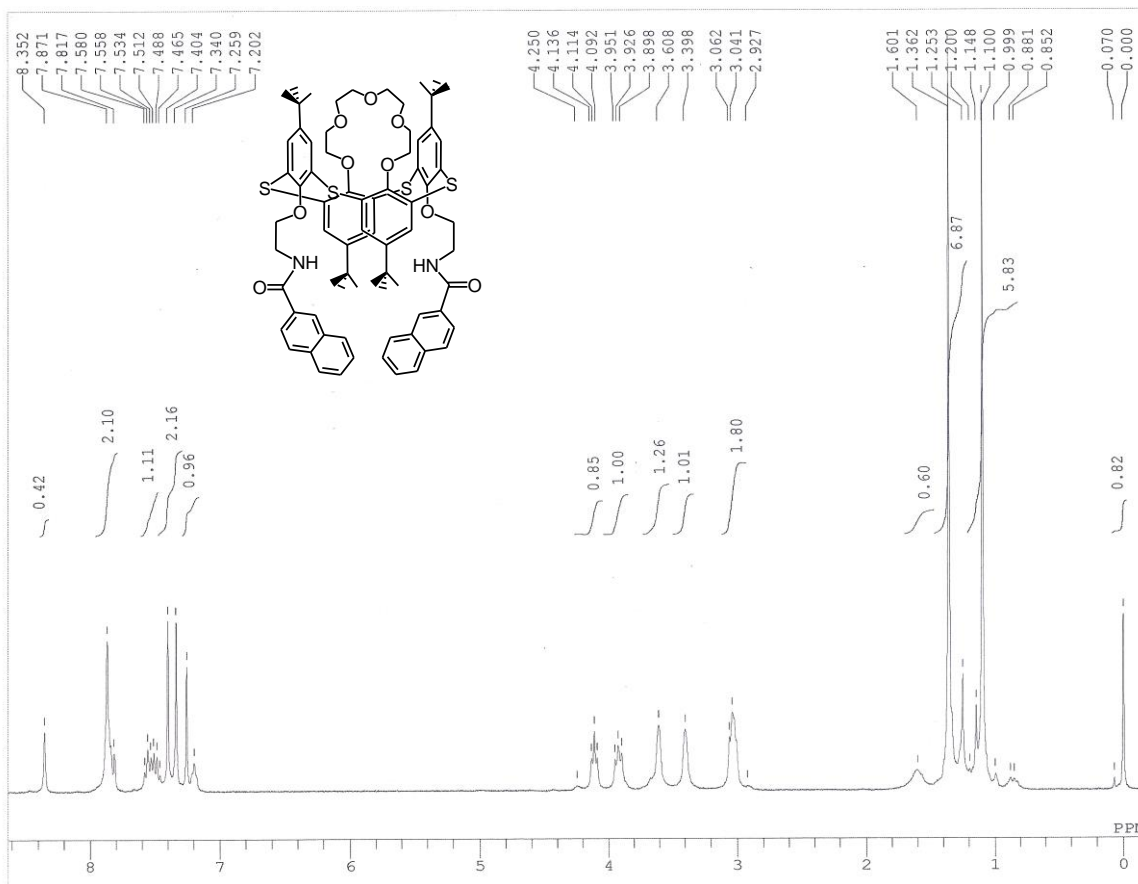

Figure S3.  $^1\text{H}$  NMR spectrum of **6** in  $\text{CDCl}_3$ .

4.  $^{13}\text{C}$  NMR Spectrum of **6** in  $\text{CDCl}_3$ .

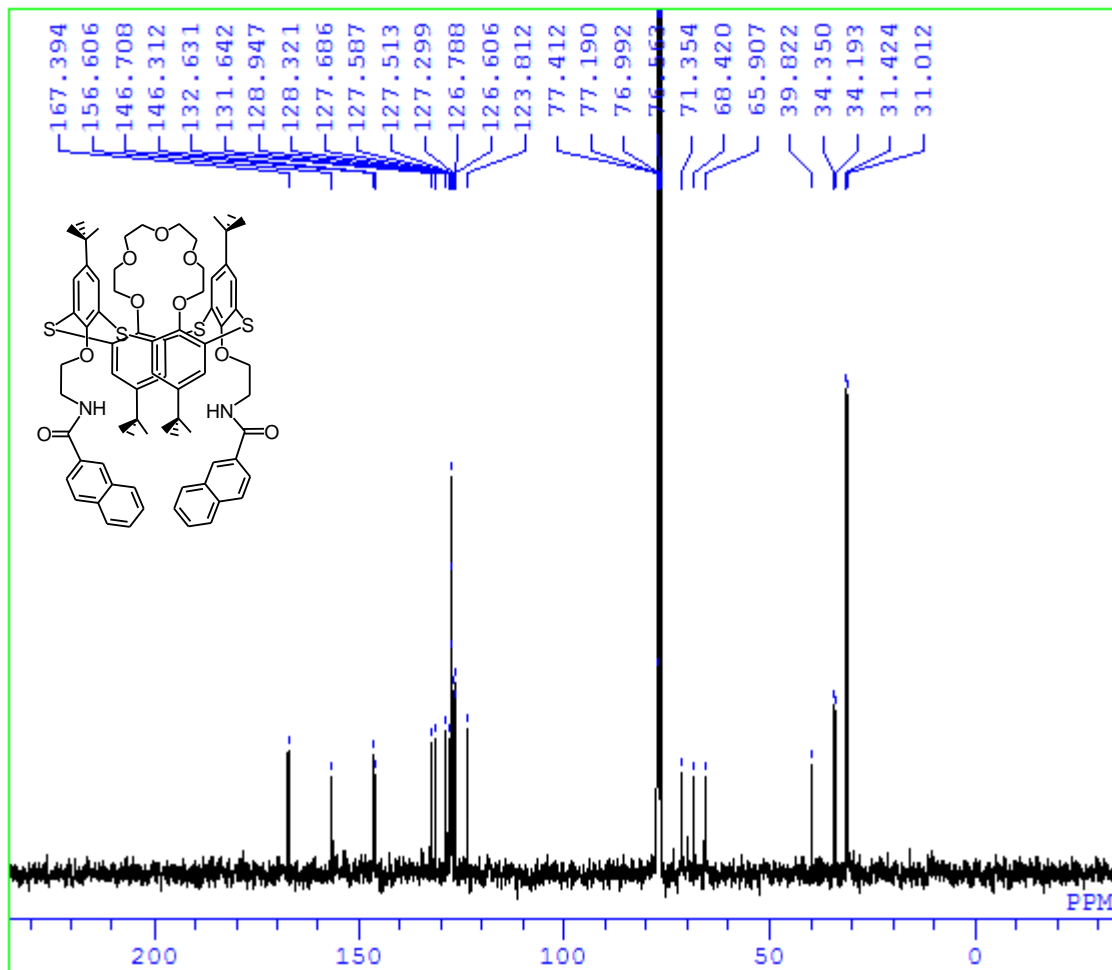

Figure S4.  $^{13}\text{C}$  NMR spectrum of **6** in  $\text{CDCl}_3$ .

## 5. ESI mass spectrum of **6**.

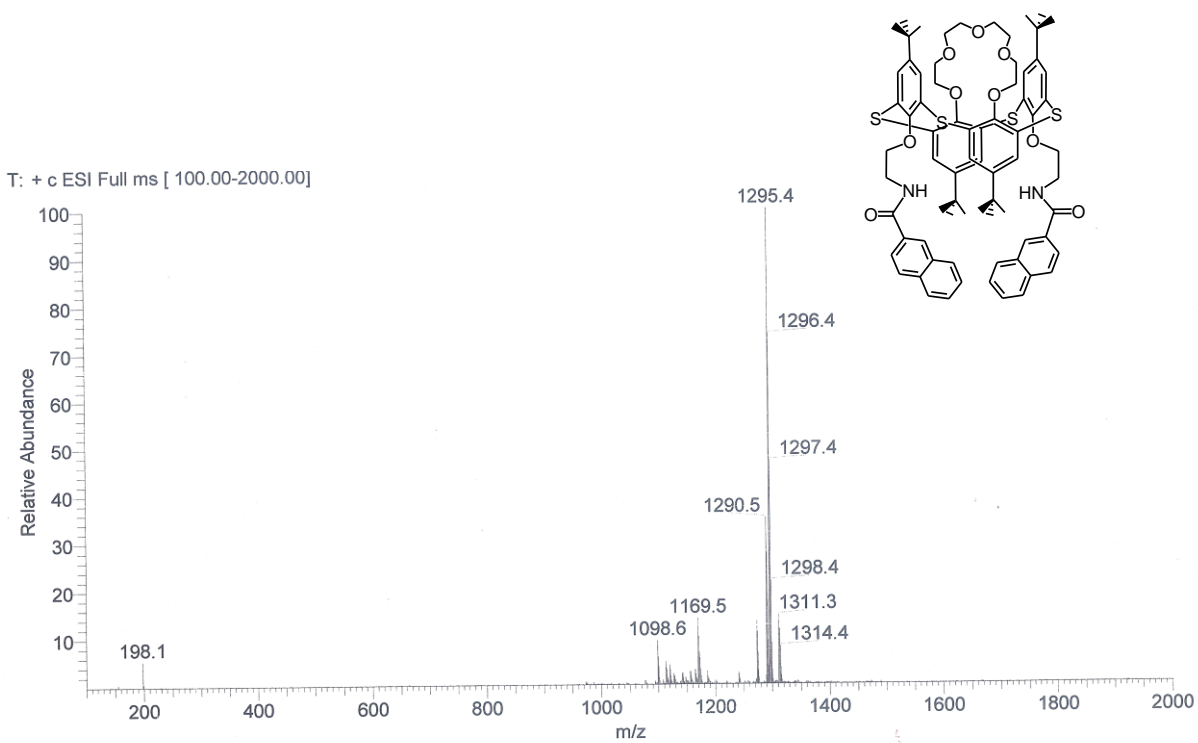

**Figure S5.** ESI-MS mass spectrum of **6**.

6.  $^1\text{H}$  NMR spectrum of **7** in  $\text{CDCl}_3$ .

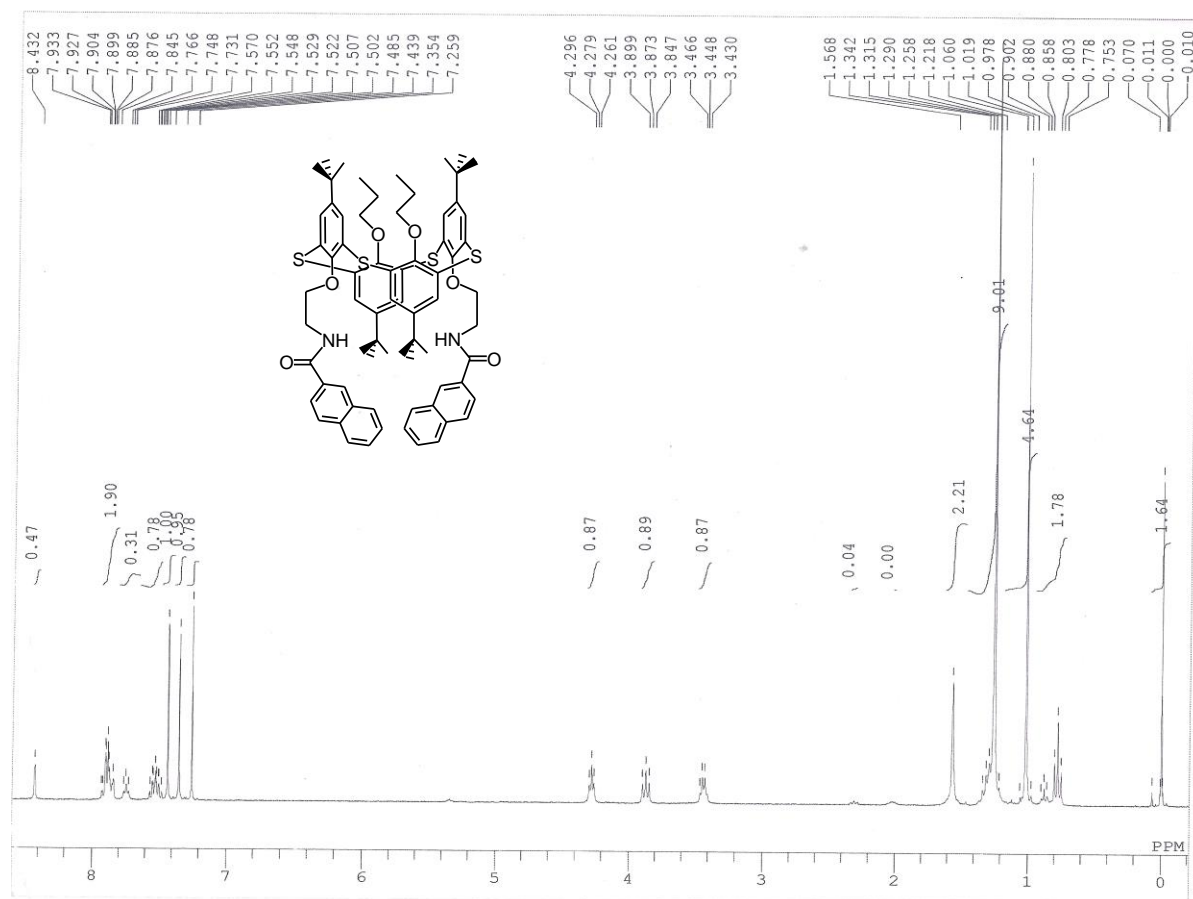

Figure S6.  $^1\text{H}$  NMR spectrum of **7** in  $\text{CDCl}_3$ .

7.  $^{13}\text{C}$  NMR Spectrum of **7** in  $\text{CDCl}_3$ .

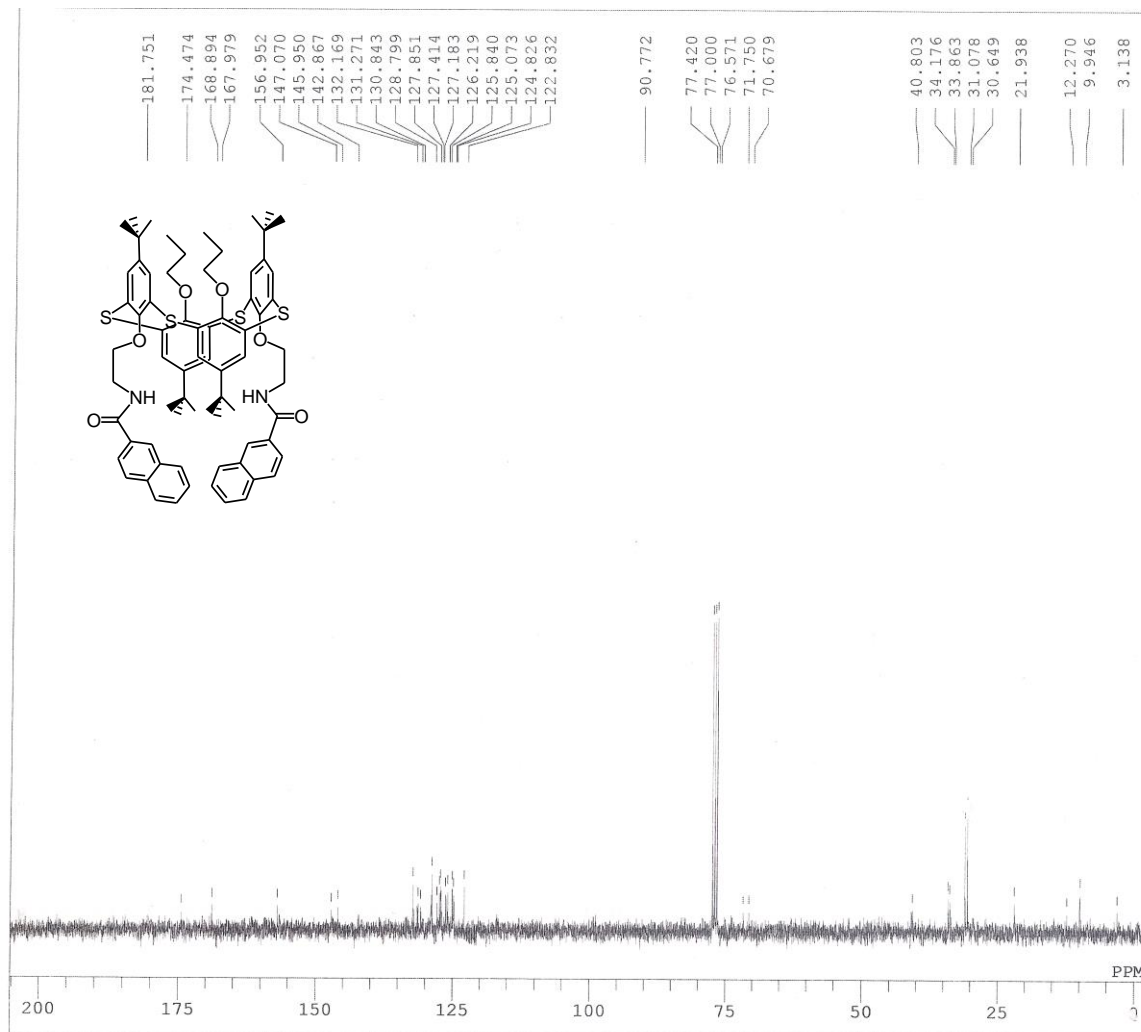

Figure S7.  $^{13}\text{C}$  NMR spectrum of **7** in  $\text{CDCl}_3$ .



8. FAB-MS mass spectrum of 7.

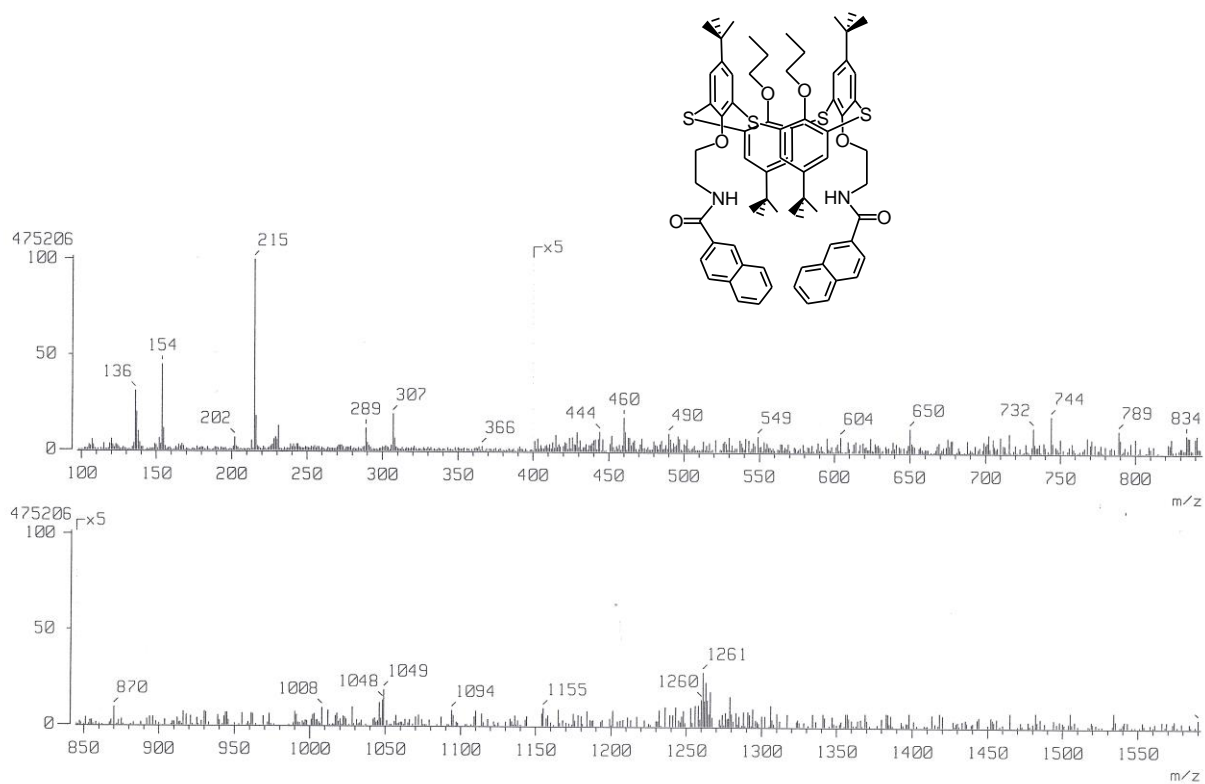

Figure S8. ESI-MS mass spectrum of 7.

9. Fluorescence spectra of compound **7** with  $\text{CN}^-$  in THF.

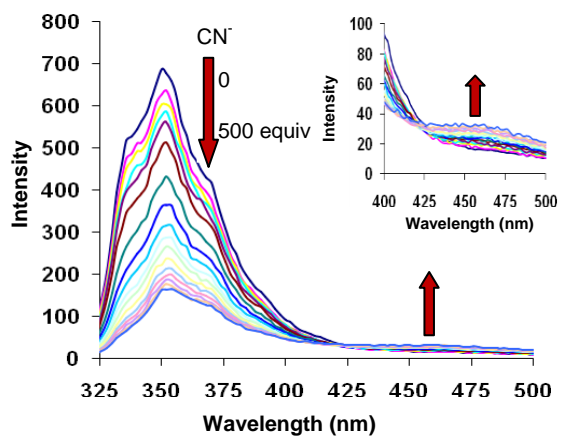

Figure S9 Fluorescence emission spectra of receptor **7** (10  $\mu\text{M}$ ) upon various addition of  $\text{CN}^-$  (0-500 equiv) in THF.

10. Selectivity of compound **7** towards  $\text{CN}^-$  in the presence of different anions in THF.

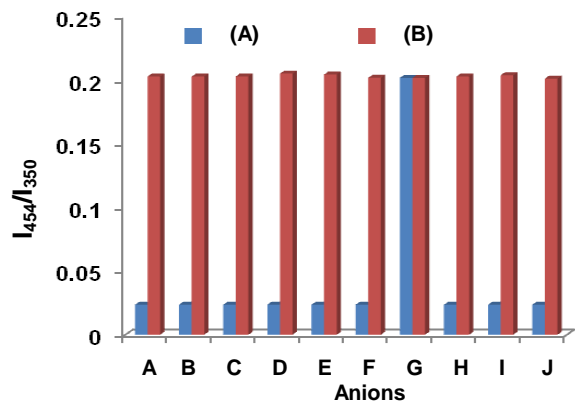

**Figure S10.** (A) Ratiometric selectivity of **7** ( $10\ \mu\text{M}$ ) towards  $\text{CN}^-$  upon addition of different anions and (B) Ratiometric competitive selectivity of **7** ( $10\ \mu\text{M}$ ) towards  $\text{CN}^-$  in the presence of different anions in THF. A=FL, B=F<sup>-</sup>, C=Cl<sup>-</sup>, D=Br<sup>-</sup>, E=I<sup>-</sup>, F=OAc<sup>-</sup>, G=CN<sup>-</sup>, H=HSO<sub>4</sub><sup>-</sup>, I=NO<sub>3</sub><sup>-</sup>, J=H<sub>2</sub>PO<sub>4</sub><sup>-</sup>.

11.  $^1\text{H}$  NMR of compound **5** +  $\text{CN}^-$  ions in  $\text{CDCl}_3$ .

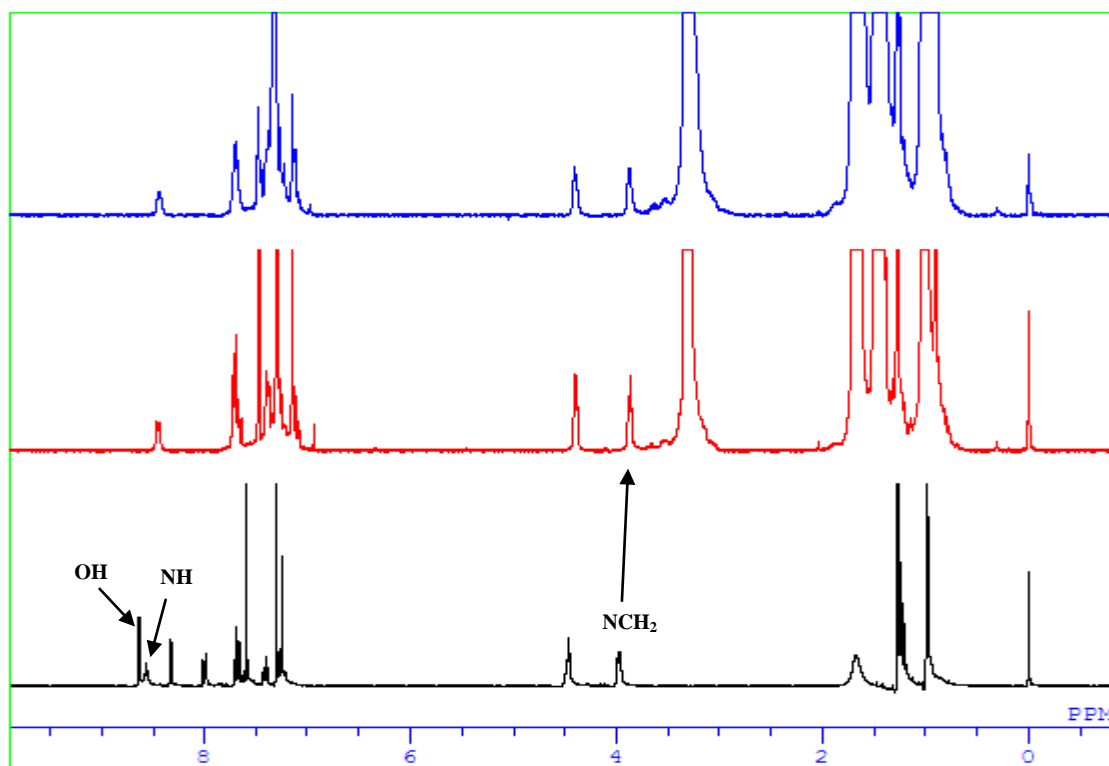

Figure S11.  $^1\text{H}$  NMR of compound **5** +  $\text{CN}^-$  ions in  $\text{CDCl}_3$ .

12.  $^1\text{H}$  NMR of compound **6** +  $\text{CN}^-$  ions in  $\text{CDCl}_3$ .

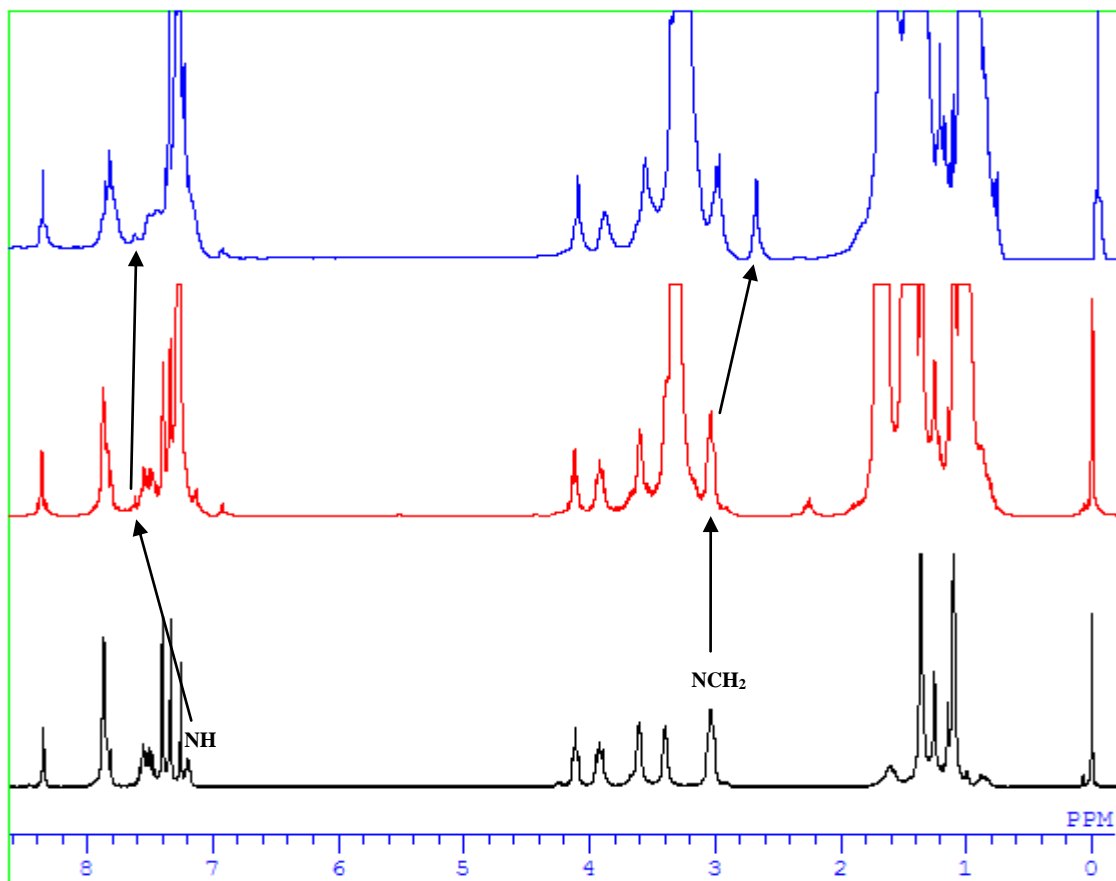

**Figure S12.**  $^1\text{H}$  NMR of compound **6** +  $\text{CN}^-$  ions in  $\text{CDCl}_3$ .

13. Selectivity of compound **5** towards  $\text{CN}^-$  in the presence of different anions in THF.

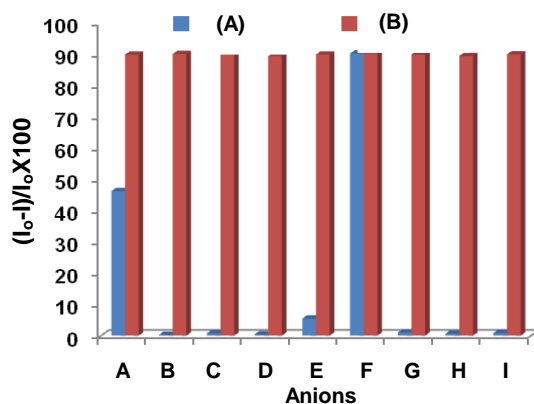

**Figure S13.** (A) Selectivity of **5** (10  $\mu\text{M}$ ) towards  $\text{CN}^-$  upon addition of different anions and (B) Competitive selectivity of **5** (10  $\mu\text{M}$ ) towards  $\text{CN}^-$  in the presence of different anions in THF. A= $\text{F}^-$ , B= $\text{Cl}^-$ , C= $\text{Br}^-$ , D= $\text{I}^-$ , E= $\text{OAc}^-$ , F= $\text{CN}^-$ , G= $\text{HSO}_4^-$ , H= $\text{NO}_3^-$ , I= $\text{H}_2\text{PO}_4^-$ .

14. Job plot of compounds 5-7 with  $\text{CN}^-$  in THF.

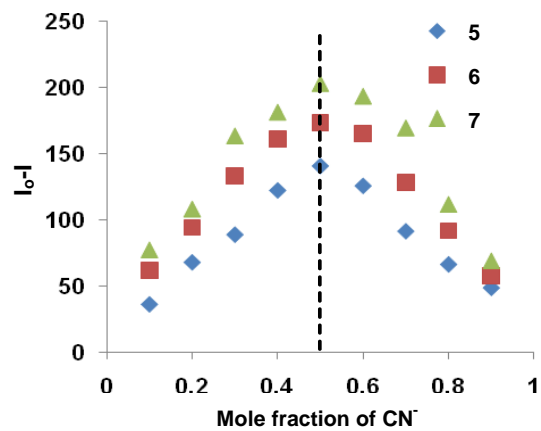

Figure S14. Job's plot of 5-7 with  $\text{CN}^-$  in THF.

15. Fluorescence spectra of compound **6** with  $\text{Fe}^{3+}$  in THF.

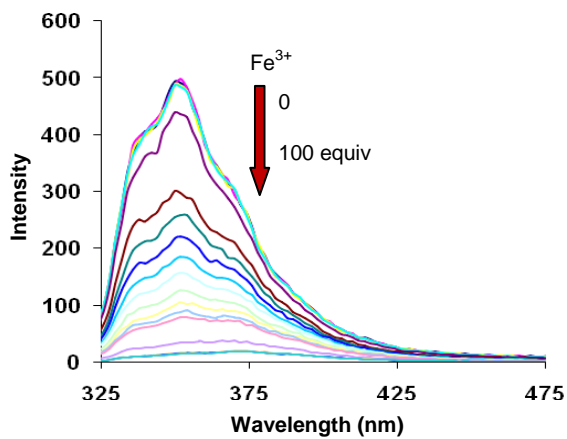

Figure S15 Fluorescence emission spectra of receptor **6** (10 μM) upon various addition of  $\text{Fe}^{3+}$  (0-100 equiv) in THF.



16. Fluorescence emission spectra of receptor **7** upon various addition of  $\text{Fe}^{3+}$  in THF.

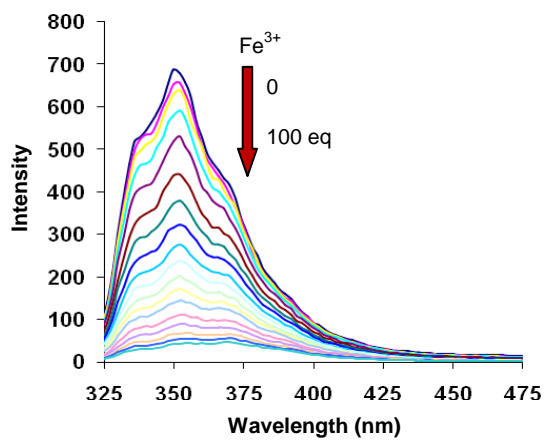

**Figure S16.** Fluorescence emission spectra of receptor **7** (10  $\mu\text{M}$ ) upon various addition of  $\text{Fe}^{3+}$  (0-100 equiv) in THF.

17. Pictorial representation of binding modes of compound 5-7 upon addition of  $\text{Fe}^{3+}$  ion.

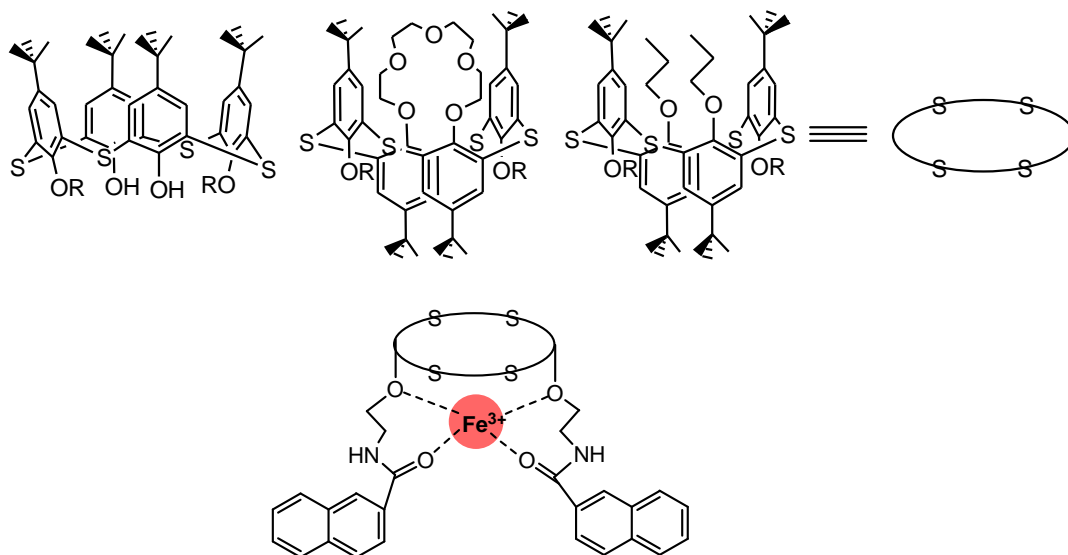

**Figure S17.** Pictorial representation of binding modes of compound 5-7 upon addition of  $\text{Fe}^{3+}$  ion.

### 18. Selectivity of compounds **5** and **6** towards $\text{Fe}^{3+}$ in THF.

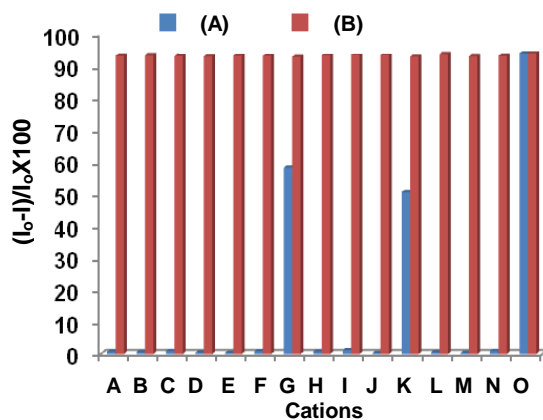

**Figure S18.** (A) Selectivity of **5** ( $10 \mu\text{M}$ ) towards  $\text{Fe}^{3+}$  upon addition of different cations and (B) Competitive selectivity of **5** ( $10 \mu\text{M}$ ) towards  $\text{Fe}^{3+}$  in the presence of different cations in 10% aqueous ethanol. A= $\text{Li}^+$ , B= $\text{Na}^+$ , C= $\text{K}^+$ , D= $\text{Ba}^{2+}$ , E= $\text{Mg}^{2+}$ , F= $\text{Ni}^{2+}$ , G= $\text{Cu}^{2+}$ , H= $\text{Zn}^{2+}$ , I= $\text{Ag}^+$ , J= $\text{Cd}^{2+}$ , K= $\text{Hg}^{2+}$ , L= $\text{Pb}^{2+}$ , M= $\text{Co}^{2+}$ , N= $\text{Fe}^{2+}$ , O= $\text{Fe}^{3+}$ .

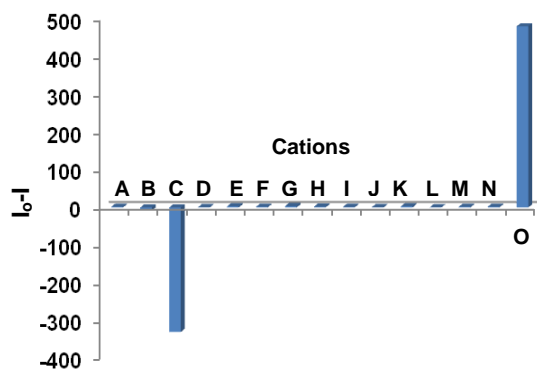

**Figure S19.** Selectivity of **6** ( $10 \mu\text{M}$ ) towards  $\text{Fe}^{3+}$  and  $\text{K}^+$  upon addition of different cations in THF. A= $\text{Li}^+$ , B= $\text{Na}^+$ , C= $\text{K}^+$ , D= $\text{Ba}^{2+}$ , E= $\text{Mg}^{2+}$ , F= $\text{Ni}^{2+}$ , G= $\text{Cu}^{2+}$ , H= $\text{Zn}^{2+}$ , I= $\text{Ag}^+$ , J= $\text{Cd}^{2+}$ , K= $\text{Hg}^{2+}$ , L= $\text{Pb}^{2+}$ , M= $\text{Co}^{2+}$ , N= $\text{Fe}^{2+}$ , O= $\text{Fe}^{3+}$ .

19. Selectivity and competitive selectivity of **7** towards  $\text{Fe}^{3+}$  in THF.

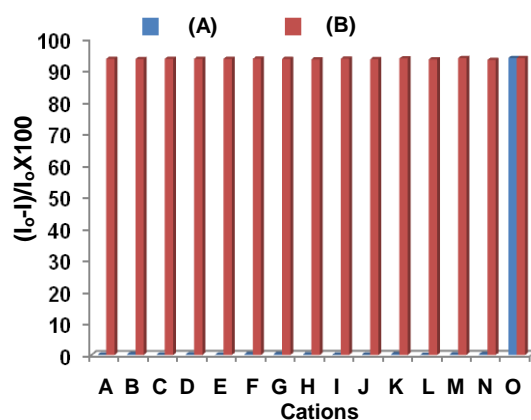

**Figure S20.** (A) Selectivity of **7** (10  $\mu\text{M}$ ) towards  $\text{Fe}^{3+}$  upon addition of different cations and (B) Competitive selectivity of **7** (10  $\mu\text{M}$ ) towards  $\text{Fe}^{3+}$  in the presence of different cations in 10% aqueous ethanol. A= $\text{Li}^+$ , B= $\text{Na}^+$ , C= $\text{K}^+$ , D= $\text{Ba}^{2+}$ , E= $\text{Mg}^{2+}$ , F= $\text{Ni}^{2+}$ , G= $\text{Cu}^{2+}$ , H= $\text{Zn}^{2+}$ , I= $\text{Ag}^+$ , J= $\text{Cd}^{2+}$ , K= $\text{Hg}^{2+}$ , L= $\text{Pb}^{2+}$ , M= $\text{Co}^{2+}$ , N= $\text{Fe}^{2+}$ , O= $\text{Fe}^{3+}$ .

20. Job plot of compounds **5-7** with  $\text{Fe}^{3+}$  in THF.

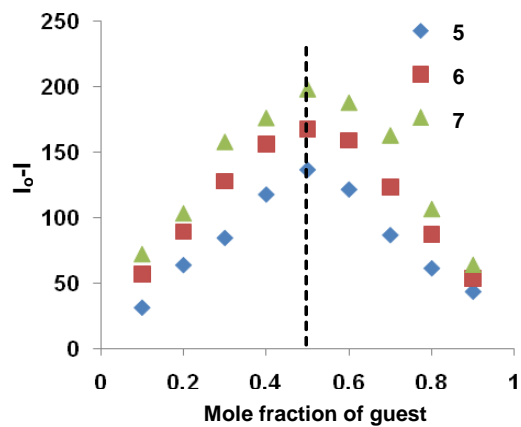

**Figure S21.** Job's plot of **5-7** with  $\text{Fe}^{3+}$  in THF.

**21.** Fluorescence emission spectra of **6**. $\text{Fe}^{3+}$  and **7**. $\text{Fe}^{3+}$  complexes upon addition of  $\text{CN}^-$  in THF.

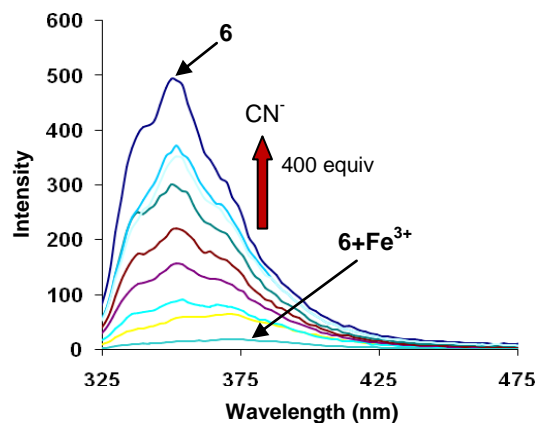

**Figure S22** Fluorescence emission spectra of receptor **6**. $\text{Fe}^{3+}$  complex upon various addition of  $\text{CN}^-$  (0-400 equiv) in THF.

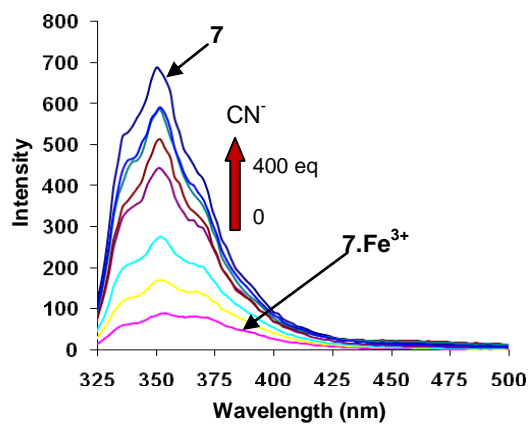

**Figure S23.** Fluorescence emission spectra of receptor **7**. $\text{Fe}^{3+}$  complex upon various addition of  $\text{CN}^-$  (0-400 equiv) in THF.

## 22. Reversibility of **5**. $\text{Fe}^{3+}$ complex with addition of $\text{CN}^-$ ion.

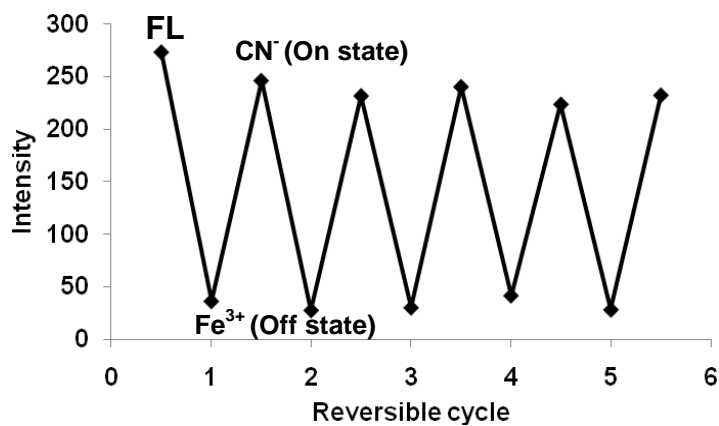

**Figure S24.** Reversibility of **5.Fe<sup>3+</sup>** complex with addition of CN<sup>-</sup> ion.

**23.** Selectivity of **5.Fe<sup>3+</sup>** complex towards CN<sup>-</sup> in the presence of other anions in THF.

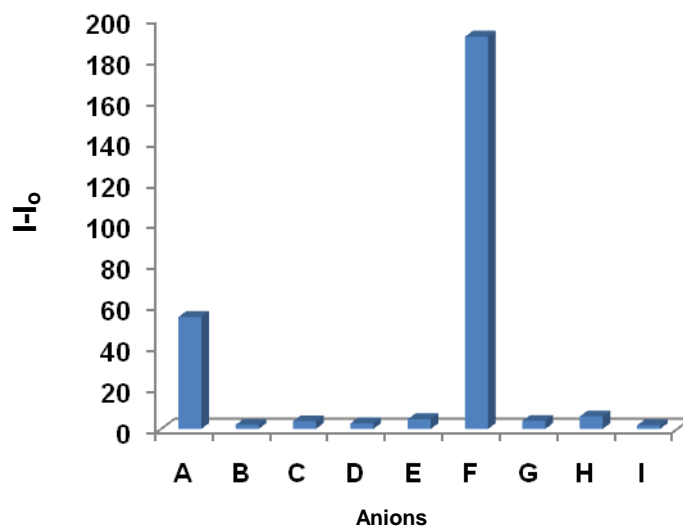

**Figure S25.** Selectivity of **5.Fe<sup>3+</sup>** complex towards CN<sup>-</sup> upon addition of different anions in THF. A=F<sup>-</sup>, B=Cl<sup>-</sup>, C=Br<sup>-</sup>, D=I<sup>-</sup>, E=OAc<sup>-</sup>, F=CN<sup>-</sup>, G=HSO<sub>4</sub><sup>-</sup>, H= NO<sub>3</sub><sup>-</sup>, I=H<sub>2</sub>PO<sub>4</sub><sup>-</sup>.  $I_0$  indicates fluorescence intensity of **5.Fe<sup>3+</sup>** complex and  $I$  indicate fluorescence intensity of **5.Fe<sup>3+</sup>-anion** complex.
